# Supplementary material for: Using a Monte Carlo Simulation Exercise to Teach Principles of Distribution: An Enhanced Version of the Classic Transportation Problem
Source: Atypon-hosted journal article supplement (doi:10.1287/ited.2018.0200), 2019-02-25
Supplement: distributionworkshopstudent.xlsx [file distributionworkshopstudent.xlsx]

## Sheet: CB_DATA_
															#VALUE!
StartOptEquations
{0.MEAN}
#REF!	#REF!	#REF!	#REF!
#REF!	#REF!	#REF!	#REF!
#REF!	#REF!	#REF!	#REF!
TRUE

## Sheet: Grid
Shipping Costs		A. BOS	B. NY	C. CH	D. IND
	1. Det	8	2	35	11
	2. Pit	12	3	31	5
	3. Buf	10	1	34	9
		A. BOS	B. NY	C. CH	D. IND	MAX	SURP
	1. Det					300
	2. Pit					180
	3. Buf					250
	Hist. Means	100	170	260	70

## Sheet: CostsTemplate
Shipping Costs		A. BOS	B. NY	C. CH	D. IND
	1. Det	8	2	35	11
	2. Pit	12	3	31	5
	3. Buf	10	1	34	9
		A. BOS	B. NY	C. CH	D. IND	Shipped	MAX	Surplus
	1. Det	40	40	40	40	160	300	140
	2. Pit	40	40	40	40	160	180	20
	3. Buf	40	40	40	40	160	250	90
ShippedTo		120	120	120	120
Actual Demand		100	170	260	70
Stock-out costs		0	3000	8400	0
Warehouse costs		400	0	0	1000
Shipping Costs		1200	240	4000	1000
TOTAL COSTS		1600	3240	12400	2000	19240

## Sheet: BOS
Month	Demand
1	106
2	82
3	68
4	112
5	122
6	151
7	93
8	160
9	119
10	100
11	47
12	20
13	44
14	70
15	95
16	124
17	123
18	112
19	112
20	99
21	86
22	56
23	91
24	115
25	99
26	143
27	80
28	109
29	95
30	186
31	44
32	113
33	151
34	79
35	76
36	130

## Sheet: NY
Month	Demand
1	187
2	165
3	180
4	217
5	192
6	184
7	148
8	161
9	86
10	170
11	218
12	168
13	119
14	98
15	201
16	218
17	229
18	197
19	187
20	111
21	220
22	222
23	160
24	153
25	50
26	240
27	223
28	217
29	148
30	157
31	119
32	220
33	201
34	130
35	194
36	197

## Sheet: CH
Month	Demand
1	214.337
2	219.983
3	221.609
4	212.121
5	251.442
6	241.28
7	337.385
8	224.212
9	246.795
10	327.785
11	256.224
12	224.52
13	200
14	316.953
15	329.237
16	360
17	230.499
18	333.658
19	212.107
20	258.367
21	270.363
22	225.62
23	230.931
24	214.319
25	294.99
26	236.663
27	279.984
28	205.311
29	219.8
30	223.256
31	268.87
32	281.265
33	231.981
34	265.108
35	220.025
36	272.65

## Sheet: IND
Month	Demand
1	70.2441
2	73.2816
3	69
4	62.6775
5	65.6802
6	67.9156
7	75.3403
8	69
9	80
10	75.5266
11	69.7585
12	67.3346
13	66.6441
14	72
15	74.1239
16	76
17	75
18	66
19	70.7975
20	69
21	68.1116
22	60
23	69.824
24	69.8194
25	66.16
26	71
27	71.4823
28	65.5843
29	73.6213
30	62.0763
31	70
32	72.561
33	68
34	69.5902
35	69.4991
36	66
